# Supplementary material for: 68Ga-DOTATOC PET/CT to detect immune checkpoint inhibitor-related myocarditis
Source: PubMed Central journal article supplement (PMC8543755; doi:10.1136/jitc-2021-003594), 2021-10-21
Supplement: jitc-2021-003594supp002.pdf [file jitc-2021-003594supp002.pdf]

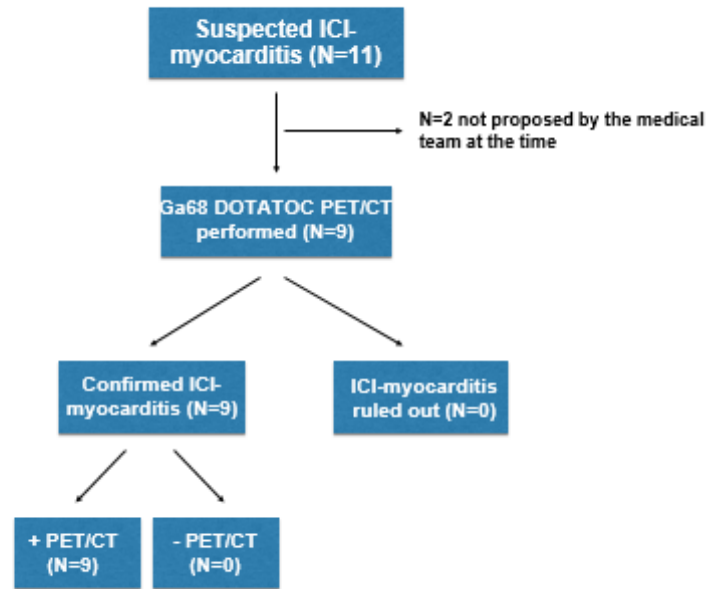

| Patient ID | Day 0 | Day 7 | Day 14 | Day 21 | Month 1 | Month 2 | Month 3 |
|------------|-------|-------|--------|--------|---------|---------|---------|
| Patient 3  | PET + |       |        |        |         |         | ▲       |
| Patient 4  | PET + |       |        |        | ☼       |         |         |
| Patient 5  | PET + |       |        |        |         | ☼       |         |
| Patient 6  | PET + |       |        |        |         |         | ▲       |
| Patient 7  | PET + |       | ▲      |        |         |         | ▲       |
| Patient 8  | PET + |       |        |        |         |         | ▲       |
| Patient 9  | PET + |       |        |        |         | ▲       |         |
| Patient 10 | PET + |       |        |        |         | ▲       |         |
| Patient 11 | PET + |       |        |        |         |         | ▲       |

|              | hs Troponin I Blood levels |
|--------------|----------------------------|
| Normal       | Blue                       |
| 1-3N         | Yellow                     |
| 3-5N         | Orange                     |
| 5-10N        | Light Red                  |
| >10N         | Dark Red                   |
| Unknown      | Grey                       |
| Missing data | Brown                      |

-  Hospitalisation for cardiological work-up
-  Death during follow-up
-  Last follow-up alive

**Supplemental Figure S1 a et S1b**
