# Supplementary material for: 68Ga-DOTATOC PET/CT to detect immune checkpoint inhibitor-related myocarditis
Source: PubMed Central journal article supplement (PMC8543755; doi:10.1136/jitc-2021-003594), 2021-10-21
Supplement: jitc-2021-003594supp003.pdf [file jitc-2021-003594supp003.pdf]

● Yes ● No ● Missing data

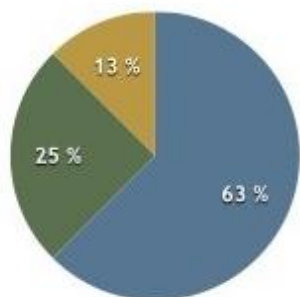

Elevated Troponine I

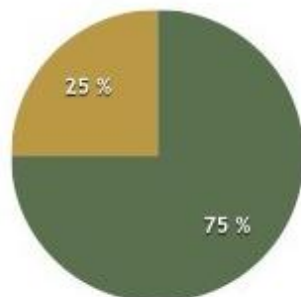

Abnormal LVEF

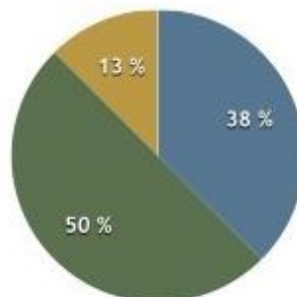

Abnormal ECG

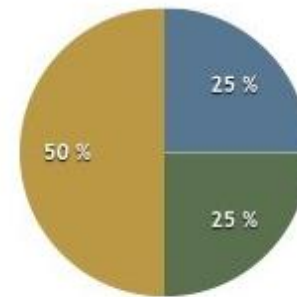

Abnormal NT-ProBNP

Patients with CMR imaging

● Yes ● No ● Missing data

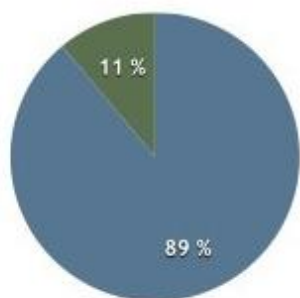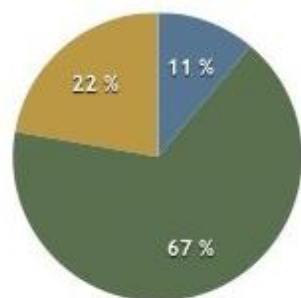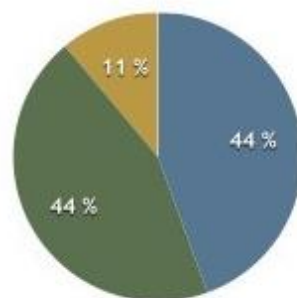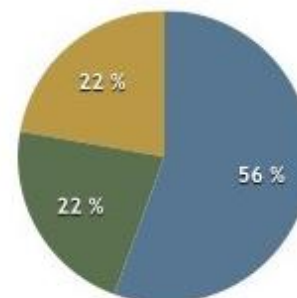

Patients with PET/CT Ga68-DOTATOC

Figure S2
