# Supplementary material for: 68Ga-DOTATOC PET/CT to detect immune checkpoint inhibitor-related myocarditis
Source: PubMed Central journal article supplement (PMC8543755; doi:10.1136/jitc-2021-003594), 2021-10-21
Supplement: jitc-2021-003594supp004.pdf [file jitc-2021-003594supp004.pdf]

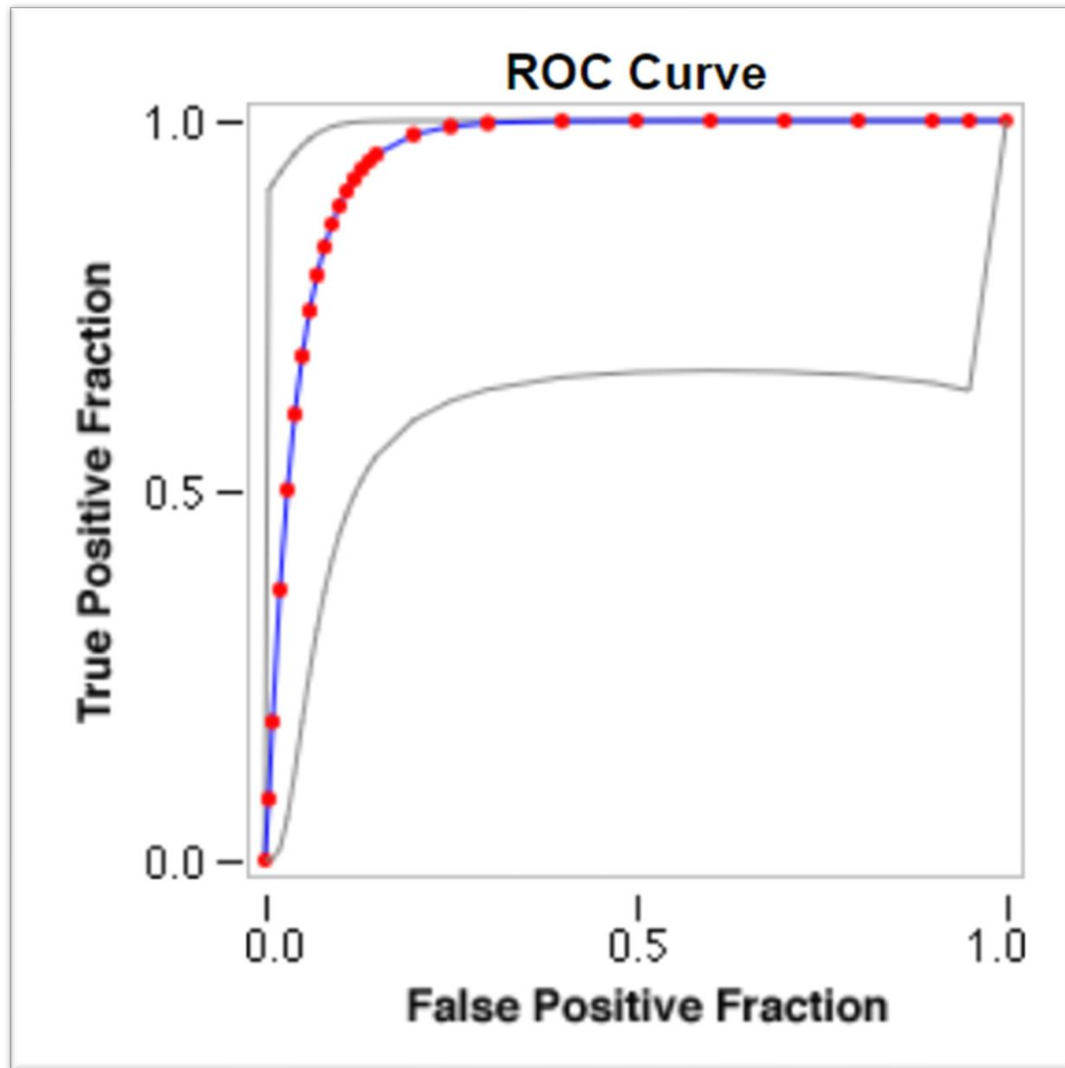

**Summary statistics**

- **Total cases: 48**
- **Positive cases: 9**
- **Negative cases: 39**
  
- **Fitted ROC Area: 0.954**

**Supplemental Figure S3**
