# Supplementary material for: 68Ga-DOTATOC PET/CT to detect immune checkpoint inhibitor-related myocarditis
Source: PubMed Central journal article supplement (PMC8543755; doi:10.1136/jitc-2021-003594), 2021-10-21
Supplement: jitc-2021-003594supp005.pdf [file jitc-2021-003594supp005.pdf]

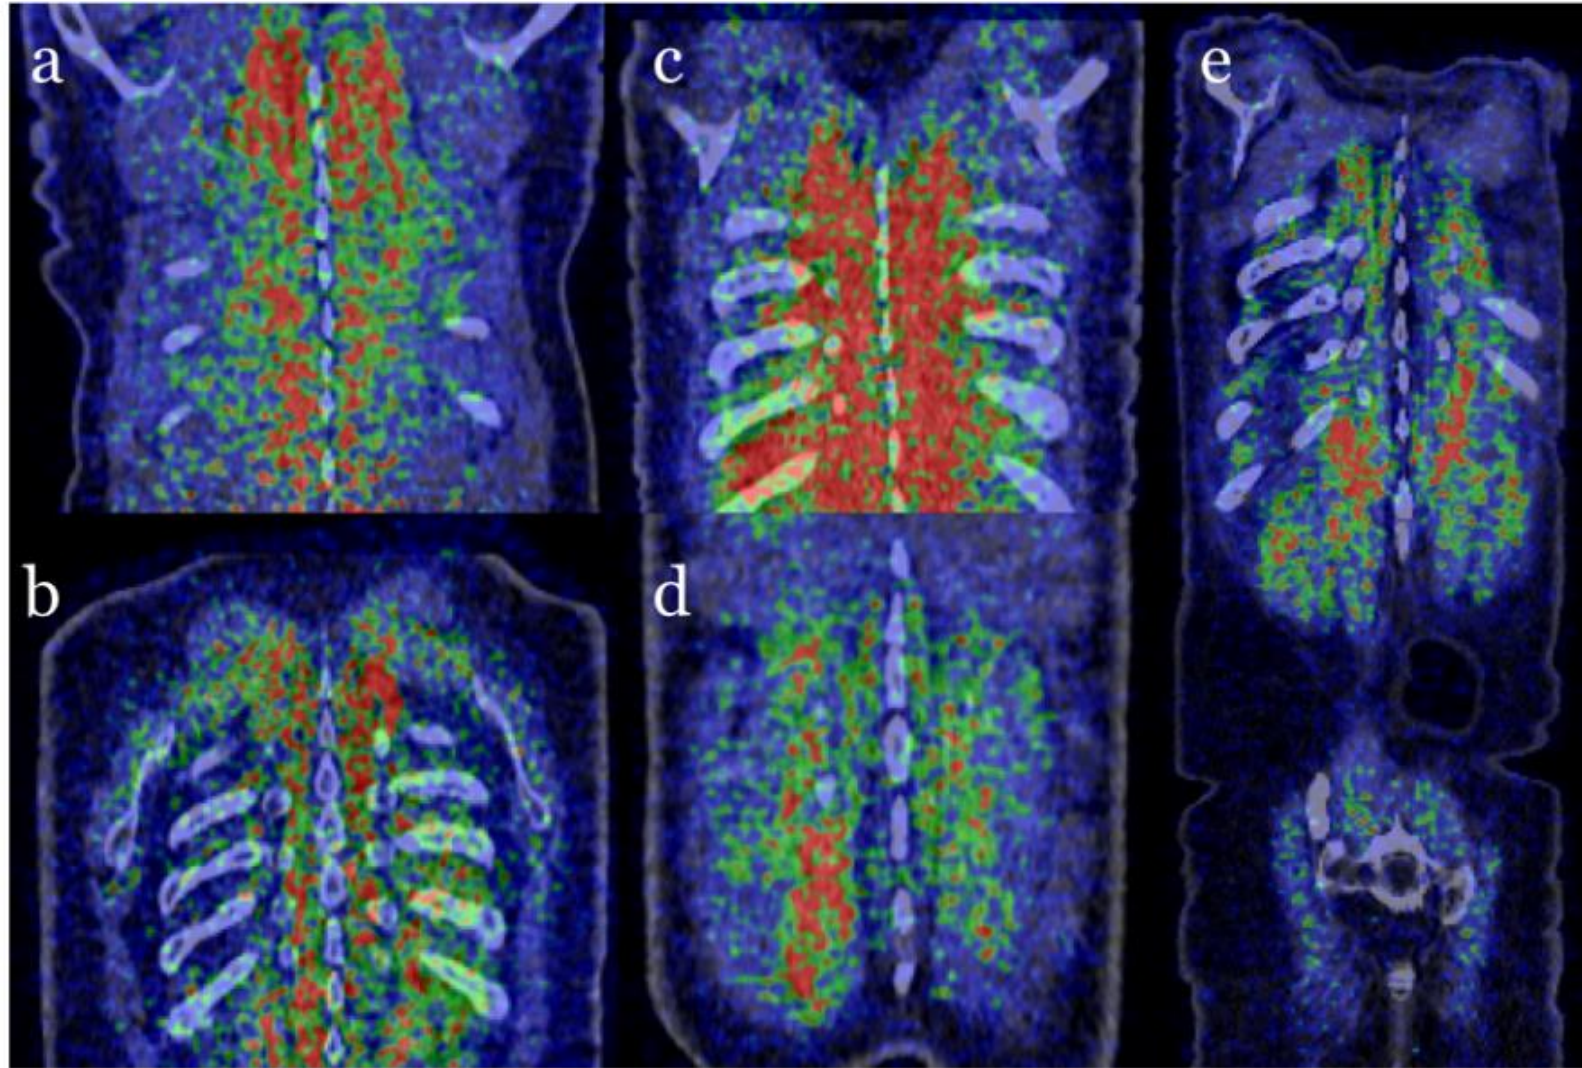**Supplemental Figure S4 A**

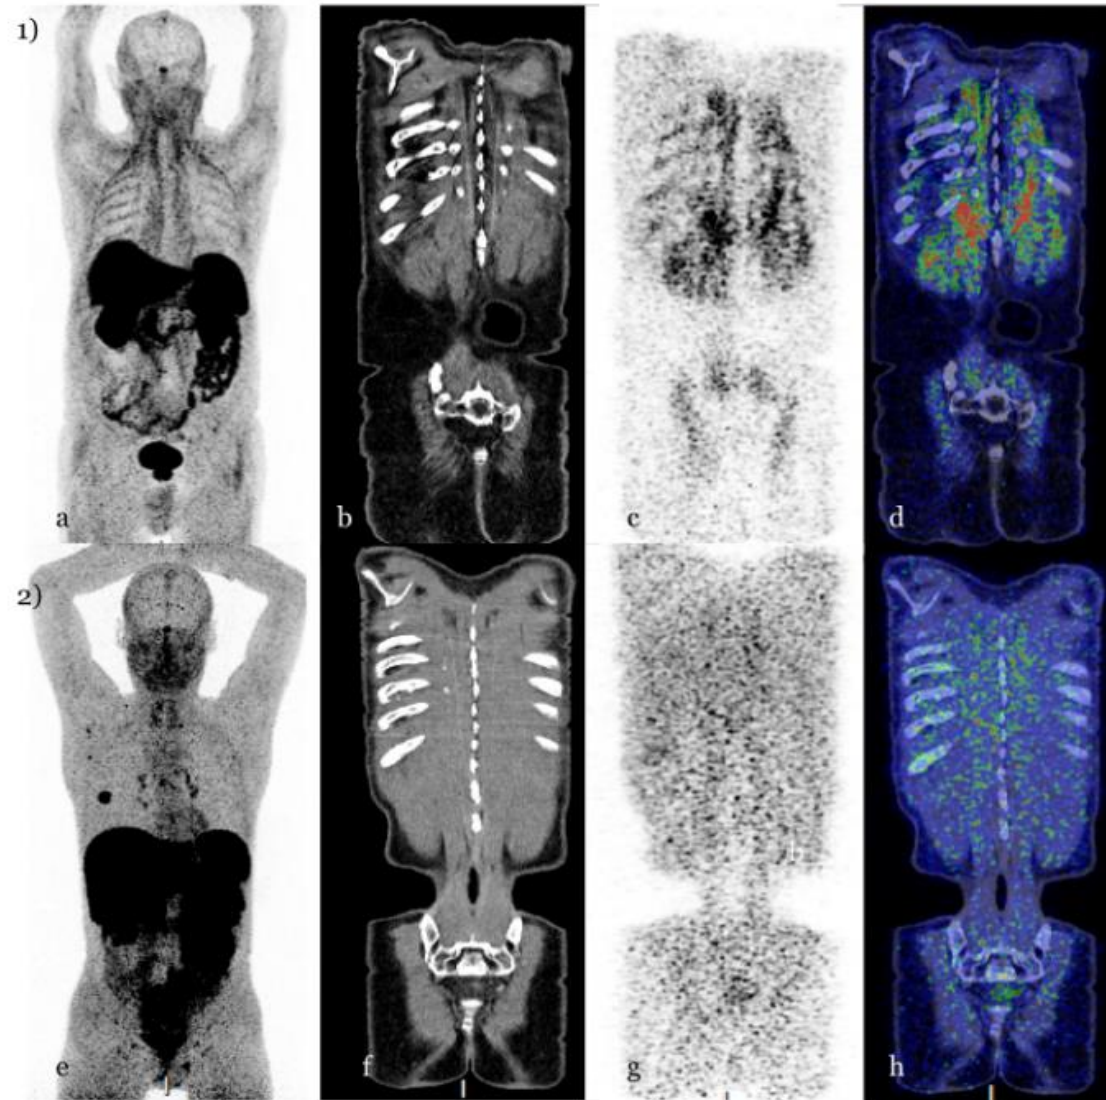**Supplemental Figure S4 B**
