# Supplementary material for: 68Ga-DOTATOC PET/CT to detect immune checkpoint inhibitor-related myocarditis
Source: PubMed Central journal article supplement (PMC8543755; doi:10.1136/jitc-2021-003594), 2021-10-21
Supplement: jitc-2021-003594supp006.pdf [file jitc-2021-003594supp006.pdf]

**A**

| Marker | Cut-off | sensitivity | specificity | ppv   | npv   | AUC   |
|--------|---------|-------------|-------------|-------|-------|-------|
| IL-6   | 12.75   | 1.000       | 0.714       | 0.996 | 1.000 | 0.786 |
| CXCL9  | 13.5    | 0.951       | 1.000       | 1.000 | 0.241 | 0.989 |
| CXCL10 | 22      | 0.956       | 1.000       | 1.000 | 0.259 | 0.990 |
| CXCL13 | 103.5   | 0.976       | 0.857       | 0.998 | 0.353 | 0.941 |

**B**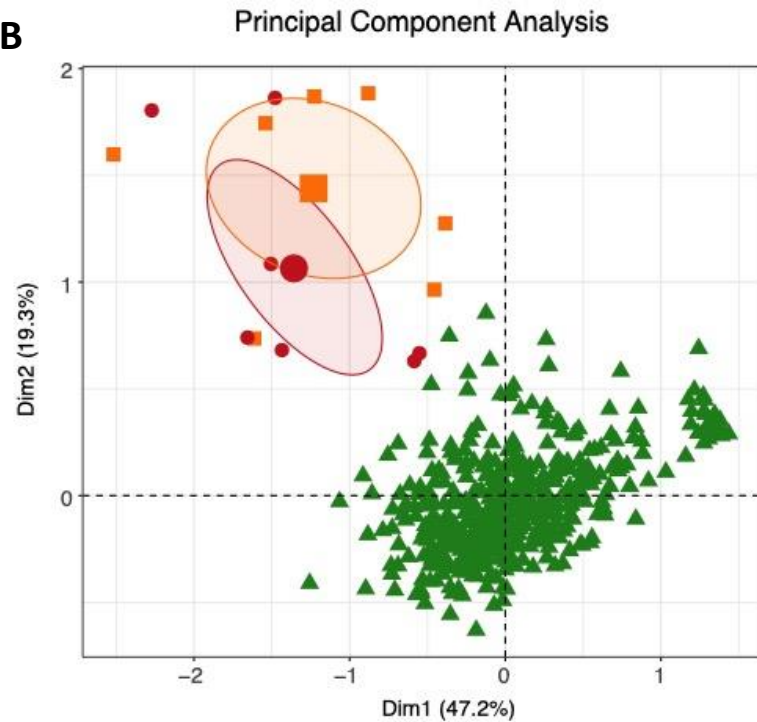

- ▲ Healthy controls
- Myocarditiy (Diagnosis)
- Myocarditiy (Post-treatment)

**Variables' contribution of PCA**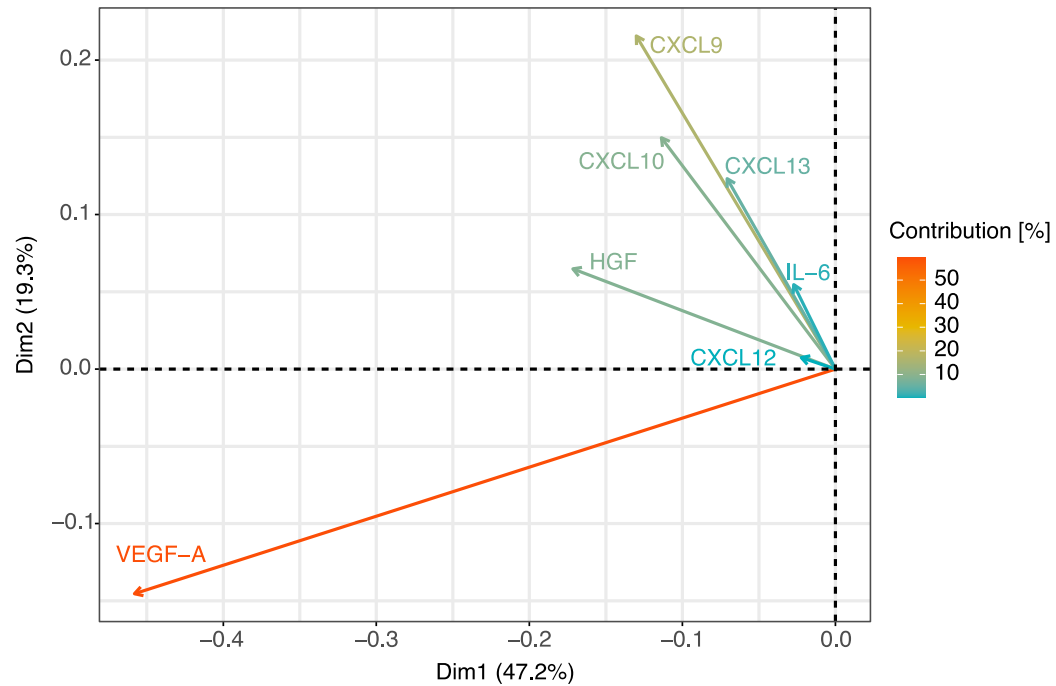**Figure S5**
